# Supplementary material
Source: MDPI journal article supplement (https://www.mdpi.com/2073-4441/11/12/2606)
Supplement: s1 [file s1]

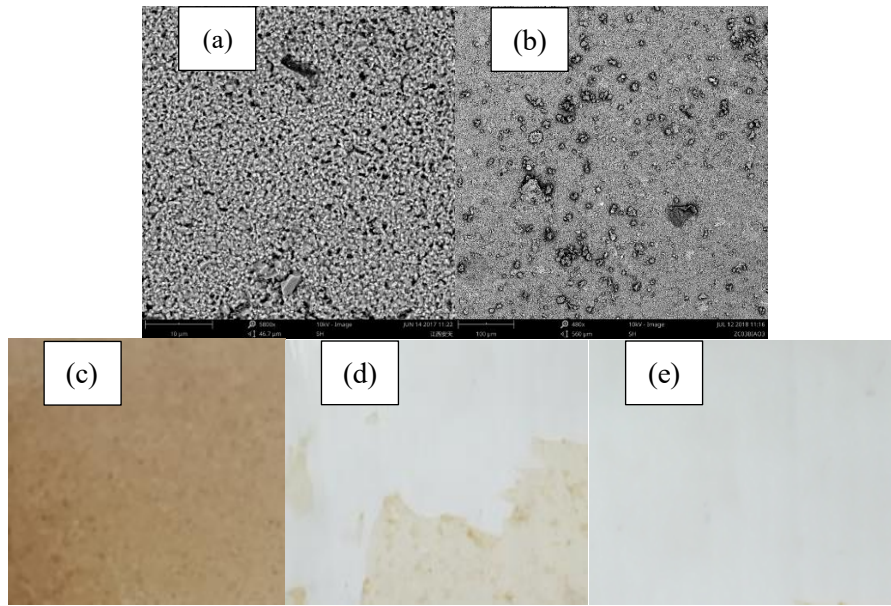

**Figure S1.** SEM images and photos of clean and fouled membrane. (a) SEM image: Clean membrane; (b) SEM image: Fouled membrane; (c) Photo: Fouled membrane; (d) Photo: Membrane after air scouring; (e) Photo: Membrane after backwashing at end of the experiment. Other experimental conditions: Coagulant concentration: 20 ppm; Coagulation method: In-situ coagulation; Operation mode: periodical relaxation, w/o backwashing, w/o aeration; Operation cycle: on/off ratio 60:1; Initial flux: ~150 LMH.

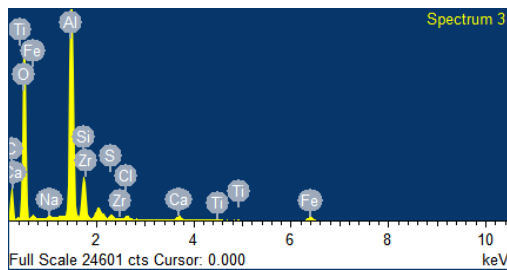

| Element | Weight% | Atomic% |
|---------|---------|---------|
| C       | 2.46    | 3.97    |
| O       | 58.72   | 71.19   |
| Al      | 24.98   | 17.95   |
| Si      | 5.91    | 4.08    |
| S       | 0.78    | 0.47    |
| Totals  | 100.00  |         |

**Figure S2.** EDX analysis of the fouled membrane. Other experimental conditions: Coagulant concentration: 20 ppm; Coagulation method: In-situ coagulation; Operation mode: periodical relaxation, w/o backwashing, w/o aeration; Operation cycle: on/off ratio 60:1; Initial flux: ~150 LMH.
